# Supplementary material for: Investigations of Single-Subunit tRNA Methyltransferases from Yeast
Source: MDPI journal article supplement (doi:10.3390/jof9101030), 2023-10-19
Supplement: s1 [file s1]

Trmlp 1 .....MEGF<sup>\*</sup>FRIP...L<sup>\*</sup>KRANLHGMLKAA<sup>\*</sup>TS...K<sup>\*</sup>IKANFTA<sup>\*</sup>YGAP<sup>\*</sup>RINIEDF<sup>\*</sup>N<sup>\*</sup>IVKEG<sup>\*</sup>  
 Trmtlp 1 MQGSSLW<sup>\*</sup>LSLT<sup>\*</sup>FRSARV<sup>\*</sup>LS<sup>\*</sup>RA<sup>\*</sup>RFFEWQSPG<sup>\*</sup>LPNTAA<sup>\*</sup>MENGTGP<sup>\*</sup>YGEER<sup>\*</sup>PREVQE<sup>\*</sup>T<sup>\*</sup>TVTEG<sup>\*</sup>

Trmlp 49 K<sup>\*</sup>AET<sup>\*</sup>IFP<sup>\*</sup>KKET<sup>\*</sup>VFYNP<sup>\*</sup>Q<sup>\*</sup>FNRDL<sup>\*</sup>SVTC<sup>\*</sup>IK<sup>\*</sup>WDN<sup>\*</sup>IYGEEC<sup>\*</sup>Q<sup>\*</sup>KRNNKKS<sup>\*</sup>KKKRC<sup>\*</sup>A<sup>\*</sup>ETNDD<sup>\*</sup>  
 Trmtlp 61 A<sup>\*</sup>AK<sup>\*</sup>IAFP<sup>\*</sup>SANE<sup>\*</sup>VFYNP<sup>\*</sup>Q<sup>\*</sup>FNRDL<sup>\*</sup>CAV<sup>\*</sup>ITE<sup>\*</sup>FA<sup>\*</sup>RI<sup>\*</sup>QLGAK<sup>\*</sup>GI<sup>\*</sup>QIKVPGE<sup>\*</sup>K<sup>\*</sup>DTQR<sup>\*</sup>V<sup>\*</sup>VVDLS<sup>\*</sup>

Trmlp 109 S<sup>\*</sup>SKRQ.....K<sup>\*</sup>MCNG<sup>\*</sup>SPKEA<sup>\*</sup>VGNSNRN<sup>\*</sup>EPY<sup>\*</sup>TNT<sup>\*</sup>LEAL<sup>\*</sup>LSAT<sup>\*</sup>GLRA<sup>\*</sup>TRYA<sup>\*</sup>HEIP<sup>\*</sup>HVRE<sup>\*</sup>V<sup>\*</sup>  
 Trmtlp 121 E<sup>\*</sup>QEEKVELKESEN<sup>\*</sup>LAS<sup>\*</sup>GDQPR<sup>\*</sup>TA<sup>\*</sup>AVGEIC<sup>\*</sup>EEGL<sup>\*</sup>HV<sup>\*</sup>LEGL<sup>\*</sup>ASGL<sup>\*</sup>RSIR<sup>\*</sup>EAL<sup>\*</sup>EV<sup>\*</sup>GLRS<sup>\*</sup>V<sup>\*</sup>

Trmlp 161 I<sup>\*</sup>AND<sup>\*</sup>ILPE<sup>\*</sup>AVE<sup>\*</sup>S<sup>\*</sup>IKRN<sup>\*</sup>VEYN<sup>\*</sup>SVEN<sup>\*</sup>IVK<sup>\*</sup>PN<sup>\*</sup>LD<sup>\*</sup>DAN<sup>\*</sup>VLMY<sup>\*</sup>RNKAT<sup>\*</sup>NN<sup>\*</sup>K<sup>\*</sup>F<sup>\*</sup>HVID<sup>\*</sup>LD<sup>\*</sup>PYGT<sup>\*</sup>VT<sup>\*</sup>P<sup>\*</sup>  
 Trmtlp 181 V<sup>\*</sup>ANDA<sup>\*</sup>STR<sup>\*</sup>AVD<sup>\*</sup>L<sup>\*</sup>IRRN<sup>\*</sup>VQLN<sup>\*</sup>D<sup>\*</sup>VAH<sup>\*</sup>LV<sup>\*</sup>QPS<sup>\*</sup>QAD<sup>\*</sup>AR<sup>\*</sup>MLMY<sup>\*</sup>QHQRV<sup>\*</sup>SE<sup>\*</sup>R<sup>\*</sup>FD<sup>\*</sup>VID<sup>\*</sup>LD<sup>\*</sup>PYGS<sup>\*</sup>PAT<sup>\*</sup>

Trmlp 221 F<sup>\*</sup>VDAN<sup>\*</sup>IQST<sup>\*</sup>IE<sup>\*</sup>EGGL<sup>\*</sup>ML<sup>\*</sup>VTCTD<sup>\*</sup>LS<sup>\*</sup>VLACN<sup>\*</sup>GY<sup>\*</sup>PEK<sup>\*</sup>CF<sup>\*</sup>AL<sup>\*</sup>YCGAN<sup>\*</sup>NMV<sup>\*</sup>SHEST<sup>\*</sup>HE<sup>\*</sup>SAL<sup>\*</sup>RIVL<sup>\*</sup>NL<sup>\*</sup>  
 Trmtlp 241 F<sup>\*</sup>LDAA<sup>\*</sup>VQAV<sup>\*</sup>SE<sup>\*</sup>EGGL<sup>\*</sup>CVTCTD<sup>\*</sup>MA<sup>\*</sup>VLACN<sup>\*</sup>.S<sup>\*</sup>GET<sup>\*</sup>CF<sup>\*</sup>SK<sup>\*</sup>YG<sup>\*</sup>.A<sup>\*</sup>MAL<sup>\*</sup>KSRAC<sup>\*</sup>HE<sup>\*</sup>MAL<sup>\*</sup>RIVL<sup>\*</sup>HS<sup>\*</sup>

Trmlp 281 L<sup>\*</sup>KQT<sup>\*</sup>A<sup>\*</sup>AK<sup>\*</sup>Y<sup>\*</sup>K<sup>\*</sup>RT<sup>\*</sup>VE<sup>\*</sup>PLLS<sup>\*</sup>LS<sup>\*</sup>IDFY<sup>\*</sup>VRV<sup>\*</sup>FV<sup>\*</sup>V<sup>\*</sup>K<sup>\*</sup>TS<sup>\*</sup>PT<sup>\*</sup>EV<sup>\*</sup>KNV<sup>\*</sup>MS<sup>\*</sup>STM<sup>\*</sup>ITY<sup>\*</sup>H<sup>\*</sup>CSR<sup>\*</sup>CC<sup>\*</sup>SY<sup>\*</sup>HN<sup>\*</sup>OP<sup>\*</sup>  
 Trmtlp 299 L<sup>\*</sup>DLR<sup>\*</sup>ANC<sup>\*</sup>Y<sup>\*</sup>Q<sup>\*</sup>RF<sup>\*</sup>VV<sup>\*</sup>PLLS<sup>\*</sup>IS<sup>\*</sup>ADFY<sup>\*</sup>VRV<sup>\*</sup>FV<sup>\*</sup>RV<sup>\*</sup>FT<sup>\*</sup>GQ<sup>\*</sup>AK<sup>\*</sup>VKA<sup>\*</sup>S<sup>\*</sup>ASK<sup>\*</sup>QAL<sup>\*</sup>VE<sup>\*</sup>QC<sup>\*</sup>VG<sup>\*</sup>CG<sup>\*</sup>AF<sup>\*</sup>HL<sup>\*</sup>OR<sup>\*</sup>

Trmlp 341 L<sup>\*</sup>GRIS<sup>\*</sup>QREG<sup>\*</sup>RNNK<sup>\*</sup>FT<sup>\*</sup>KYS<sup>\*</sup>VAC<sup>\*</sup>GPPV<sup>\*</sup>DTK<sup>\*</sup>CK<sup>\*</sup>FC<sup>\*</sup>EGTY<sup>\*</sup>HL<sup>\*</sup>AG<sup>\*</sup>PMYA<sup>\*</sup>GPH<sup>\*</sup>HNK<sup>\*</sup>EF<sup>\*</sup>TEE<sup>\*</sup>VLR<sup>\*</sup>IT<sup>\*</sup>  
 Trmtlp 359 L<sup>\*</sup>GRAS<sup>\*</sup>GVPSGR...A<sup>\*</sup>KES<sup>\*</sup>AAC<sup>\*</sup>GPPV<sup>\*</sup>TPE<sup>\*</sup>CE<sup>\*</sup>HC<sup>\*</sup>GQRH<sup>\*</sup>QL<sup>\*</sup>GC<sup>\*</sup>PMWA<sup>\*</sup>EPH<sup>\*</sup>DL<sup>\*</sup>DFV<sup>\*</sup>GRVLE<sup>\*</sup>EA<sup>\*</sup>

Trmlp 401 NKEEHRDQDD<sup>\*</sup>T<sup>\*</sup>YG<sup>\*</sup>TRK<sup>\*</sup>RIE<sup>\*</sup>GM<sup>\*</sup>LS<sup>\*</sup>LAKN<sup>\*</sup>ET<sup>\*</sup>SD<sup>\*</sup>SPFY<sup>\*</sup>SPNH<sup>\*</sup>IAS<sup>\*</sup>VIK<sup>\*</sup>LQ<sup>\*</sup>VPP<sup>\*</sup>LKK<sup>\*</sup>V<sup>\*</sup>VAG<sup>\*</sup>LG<sup>\*</sup>  
 Trmtlp 415 VSANP...GR<sup>\*</sup>HT<sup>\*</sup>ST<sup>\*</sup>SR<sup>\*</sup>IR<sup>\*</sup>G<sup>\*</sup>LS<sup>\*</sup>VI<sup>\*</sup>ITE<sup>\*</sup>ET<sup>\*</sup>DP<sup>\*</sup>LY<sup>\*</sup>Y<sup>\*</sup>TL<sup>\*</sup>DQ<sup>\*</sup>LS<sup>\*</sup>ST<sup>\*</sup>HC<sup>\*</sup>NT<sup>\*</sup>PS<sup>\*</sup>LL<sup>\*</sup>QL<sup>\*</sup>RSAL<sup>\*</sup>LL<sup>\*</sup>

Trmlp 461 S<sup>\*</sup>LC<sup>\*</sup>FE<sup>\*</sup>C<sup>\*</sup>SL<sup>\*</sup>HA<sup>\*</sup>QPS<sup>\*</sup>SL<sup>\*</sup>KTN<sup>\*</sup>APWD<sup>\*</sup>AIW<sup>\*</sup>YVM<sup>\*</sup>QK<sup>\*</sup>CD<sup>\*</sup>DE<sup>\*</sup>K.KDLS<sup>\*</sup>KMN<sup>\*</sup>PNT<sup>\*</sup>ITG<sup>\*</sup>YK<sup>\*</sup>ILS<sup>\*</sup>AMP<sup>\*</sup>GWL<sup>\*</sup>  
 Trmtlp 471 H<sup>\*</sup>AD<sup>\*</sup>ERV<sup>\*</sup>SL<sup>\*</sup>SHA<sup>\*</sup>CKN<sup>\*</sup>AV<sup>\*</sup>KT<sup>\*</sup>DAPAS<sup>\*</sup>ALW<sup>\*</sup>DI<sup>\*</sup>MR<sup>\*</sup>CE<sup>\*</sup>KE<sup>\*</sup>CPVKR<sup>\*</sup>ERL<sup>\*</sup>SE<sup>\*</sup>TS<sup>\*</sup>PA<sup>\*</sup>FR<sup>\*</sup>ILS<sup>\*</sup>VE<sup>\*</sup>PR<sup>\*</sup>LO<sup>\*</sup>

Trmlp 520 S.....G<sup>\*</sup>TV<sup>\*</sup>K<sup>\*</sup>SEYDSK<sup>\*</sup>LS<sup>\*</sup>FA<sup>\*</sup>PNEQSG.....N<sup>\*</sup>IE<sup>\*</sup>KL<sup>\*</sup>RKL<sup>\*</sup>KIV<sup>\*</sup>R<sup>\*</sup>YQEN<sup>\*</sup>  
 Trmtlp 531 ANFTIREDANPSSRQR<sup>\*</sup>GL<sup>\*</sup>K<sup>\*</sup>RFQANPE<sup>\*</sup>ANW<sup>\*</sup>G<sup>\*</sup>PRPRARPGGKAAD<sup>\*</sup>EA<sup>\*</sup>ME<sup>\*</sup>ERR<sup>\*</sup>RL<sup>\*</sup>LQN<sup>\*</sup>K<sup>\*</sup>RKE<sup>\*</sup>P<sup>\*</sup>

Trmlp 557 P<sup>\*</sup>TKNWGP<sup>\*</sup>K<sup>\*</sup>AR<sup>\*</sup>PN<sup>\*</sup>TS.....  
 Trmtlp 591 P<sup>\*</sup>EDVAQRA<sup>\*</sup>AR<sup>\*</sup>LK<sup>\*</sup>TF<sup>\*</sup>PKRFKEGTCQ<sup>\*</sup>RGD<sup>\*</sup>QCCYSHSPPTPRVSADAAPDCPETS<sup>\*</sup>NQTPPGP<sup>\*</sup>

**Figure S1.** Sequence comparison between Trm1p from *Saccharomyces cerevisiae* and Trmt1p from *Homo sapiens*. Uniport entries of Trm1p and Trmt1p are P15565 and Q9NXH9, respectively. The overall identity and similarity between these two sequences are 34.2% and 50.4%, respectively. The alignments illustrated in Fig. S1-S8 were generated by the ClustalW web server using BLOSUM as the weight matrix [1] and these figures were prepared using ESPript [2].

|       |   |                                            |                 |    |
|-------|---|--------------------------------------------|-----------------|----|
| Trm2p | 1 | MYEQFEFSFFFENS DNKVYKAHLISSIKRWSIITCMRCFWT | VQKSIFKARFFACRN | FV |
| RHO4a | 1 | .....                                      | MN              | TL |

|       |    |                           |    |    |         |         |                    |
|-------|----|---------------------------|----|----|---------|---------|--------------------|
| Trm2p | 61 | KKHNYKLTSTMTGSTEEMVPTIMKH | TV | DN | KRLSSPI | TDSGNRR | TKKPKLRKYKAKKVEITS |
| RHO4a | 15 | ...NESN                   | IV | SS | QGS     | SSSNL   | PESPG              |

|       |     |                    |               |             |      |    |     |         |
|-------|-----|--------------------|---------------|-------------|------|----|-----|---------|
| Trm2p | 121 | PMGVLEFEVNDLLKSQNL | SREQVLNDVTSIL | NDKSSTDGPIV | LQYH | RE | VKN | KVLEITS |
| RHO4a | 69  | PD                 | .....         | YH          | LK   | IV | VV  | GDGA    |

|       |     |              |    |        |       |        |       |    |
|-------|-----|--------------|----|--------|-------|--------|-------|----|
| Trm2p | 181 | GNGLALIDNPVE | TE | KKQVVI | IP    | FGLPGD | VV    | NI |
| RHO4a | 87  | CLL          | IS | YV     | QGTFP | TD     | ..... | Y  |

|       |     |            |    |     |    |    |           |    |
|-------|-----|------------|----|-----|----|----|-----------|----|
| Trm2p | 241 | IRDKYFGKSS | GS | QLE | FT | YD | DQLELKRKT | IM |
| RHO4a | 118 | .....      | GI | IE  | AL | WD | TAGQEYSR  | LR |

|       |     |   |   |                         |       |                                 |
|-------|-----|---|---|-------------------------|-------|---------------------------------|
| Trm2p | 301 | G | Y | RTKITPHFDMPKRRQKELSVRPP | FG    | QKGRPQWRKDTLDIGGHGSILDIDECVLATE |
| RHO4a | 151 | C | Y | SVGSKTSLKN              | ..... | VED                             |

|       |     |          |    |     |           |       |       |     |
|-------|-----|----------|----|-----|-----------|-------|-------|-----|
| Trm2p | 361 | VLNKGLTN | ER | RKF | EQEFKNYKK | GATIL | IRENT | TIL |
| RHO4a | 170 | .....    | EV | KHF | CPSTPIMLV | GL    | KSD   | LY  |

|       |     |   |     |   |    |       |    |    |
|-------|-----|---|-----|---|----|-------|----|----|
| Trm2p | 421 | E | VED | K | NN | VRLAK | TC | V  |
| RHO4a | 205 | E | SLA | K | R  | LGA   | FA | HI |

|       |     |          |    |    |    |     |    |     |
|-------|-----|----------|----|----|----|-----|----|-----|
| Trm2p | 481 | PAKGDDNK | TK | FL | VD | AYC | GS | GLF |
| RHO4a | 261 | .....    | T  | RS | D  | IS  | SI | GS  |

|       |     |                              |       |         |         |       |            |
|-------|-----|------------------------------|-------|---------|---------|-------|------------|
| Trm2p | 541 | IVGKAELFESIDTPSENTSVILDPPRKG | CDE   | FLKQLAA | YNPAKII | YIS   | CNVHSQARDV |
| RHO4a |     | .....                        | ..... | .....   | .....   | ..... | .....      |

|       |     |                                   |    |   |     |
|-------|-----|-----------------------------------|----|---|-----|
| Trm2p | 601 | EYFLKETENGSAHQIESIRGFDFFPQTHHVESV | CI | M | KRI |
| RHO4a | 288 | .....                             | CI | I | M   |

**Figure S2.** Sequence comparison between Trm2p from *Saccharomyces cerevisiae* and RHO4a protein from *Saccharomyces cerevisiae*. Uniport entries of Trm2p and RHO4a are P33753 and Q00246, respectively. The overall identity and similarity between these two sequences are 19.6% and 34.5%, respectively.

|        |     |        |   |       |   |   |   |   |   |   |   |   |   |   |   |       |   |   |   |   |   |   |   |   |   |   |       |   |   |    |   |   |   |   |   |   |   |   |   |   |   |   |   |   |   |   |   |   |   |       |   |   |       |   |   |   |   |   |   |   |   |
|--------|-----|--------|---|-------|---|---|---|---|---|---|---|---|---|---|---|-------|---|---|---|---|---|---|---|---|---|---|-------|---|---|----|---|---|---|---|---|---|---|---|---|---|---|---|---|---|---|---|---|---|---|-------|---|---|-------|---|---|---|---|---|---|---|---|
| Trm3p  | 1   | .....M | V | G     | G | A | L | I | C | K | Y | L | P | R | E | Q     | T | K | L | I | S | D | L | I | Q | N | D     | S | L | E  | E | V | L | E | L | I | E | T | S | P | L | D | I | T |   |   |   |   |   |       |   |   |       |   |   |   |   |   |   |   |   |
| TARBP1 | 1   | MEWVLA | E | A     | L | L | S | Q | S | R | D | P | R | A | L | L     | G | A | I | C | Q | G | E | A | S | A | E     | R | V | E  | T | L | R | F | L | L | Q | R | L | E | D | E | A | R | G | S | G | G | A | G     | A | T | P     | E | A |   |   |   |   |   |   |
| Trm3p  | 45  | T      | D | S     | N | I | E | T | P | I | F | E | K | I | T | E     | Q | V | I | A | Y | A | S | I | D | G | ..... | E | A | R  | E | M | F | R | S | S | R | A | E | M | N | K | A | L | R | T | S | A | Q | L     | L | C | C     | L | P | S |   |   |   |   |   |
| TARBP1 | 61  | A      | R | E     | V | A | A | G | Y | L | V | P | L | L | R | S     | L | R | G | R | P | A | G | G | P | D | P     | S | L | Q  | P | R | H | R | R | V | L | R | A | A | G | A | L | R | S | C | V | R | L | A     | G | R | P     | Q | L | A | A | L |   |   |   |
| Trm3p  | 99  | V      | W | H     | K | F | Q | V | W | M | S | Y | R | L | N | D     | I | I | S | E | N | Y | K | H | L | F | N     | D | N | .. | F | G | K | K | I | V | O | P | F | F | D | S | E | A | E | E | Q | N | A | N     | I | K | ..... | H | E |   |   |   |   |   |   |
| TARBP1 | 121 | A      | E | E     | A | L | R | D | L | L | A | G | W | R | A | P     | G | A | E | A | A | V | E | V | L | A | A     | V | G | P  | C | L | R | P | R | E | D | G | E | L | L | E | R | V | A | G | T | A | V | A     | L | G | G     | G | D | G | D | E |   |   |   |
| Trm3p  | 151 | N      | L | H     | D | I | T | S | L | I | H | Y | L | E | V | V     | Y | T | F | D | E | C | K | N | G | I | S     | S | K | C  | L | D | F | T | I | V | P | L | T | G | C | N | S | E | E | T | A | D | S | C     | S | K | L     | M | R | W | H | I | K | Y |   |
| TARBP1 | 181 | A      | G | P     | A | E | D | A | A | L | V | A | G | R | L | L     | P | V | L | V | Q | C | G | G | A | L | R     | A | V | W  | G | G | L | A | A | P | C | A | S | L | G | S | G | R | V | E | E | K | L | L     | V | L | S     | A | L | A | E | K | L |   |   |
| Trm3p  | 211 | L      | S | ..... | K | C | C | N | I | D | S | N | F | D | K | L     | I | W | T | F | I | K | Q | L | Y | A | E     | G | S | Q  | Q | A | W | K | Q | K | N | S | L | S | F | L | L | R | F | T | L | A | E | L     | S |   |       |   |   |   |   |   |   |   |   |
| TARBP1 | 241 | L      | P | E     | P | G | G | D | R | A | R | G | A | R | E | A     | G | P | D | A | R | R | C | W | R | F | W     | R | T | V  | Q | A | L | G | Q | A | D | A | L | T | R | K | R | A | R | Y | L | Q | R | A     | V | E | S     | A | E | L | G |   |   |   |   |
| Trm3p  | 261 | P      | E | L     | I | T | Y | I | K | T | D | A | Y | W | R | H     | I | Q | T | E | L | D | N | D | V | H | E     | H | R | K  | L | A | L | S | I | L | K | L | T | I | Q | K | L | S | S | H | G | I | T | ..... | L | Q | T     | T | F | Y | K |   |   |   |   |
| TARBP1 | 301 | D      | C | T     | C | G | P | Q | E | G | N | G | P | S | L | F     | W | W | S | E | R | K | K | D | E | L | L     | K | F | W  | E | N | Y | I | L | I | M | P | T | L | E | G | N | Q | I | H | V | I | K | P     | V | L | P     | K | I | N | N | L | F | E | Y |
| Trm3p  | 316 | C      | N | D     | L | A | N | I | E | M | L | G | S | W | K | K     | F | T | T | L | Y | E | M | T | A | L | D     | T | S | L  | N | Q | I | A | A | K | Q | D | I | T | K | I | F | D | N | E | H | L | H | S     | W | G | L     | I | L | L | S | T | C |   |   |
| TARBP1 | 361 | A      | V | S     | E | E | N | G | C | W | L | F | H | P | S | W     | H | M | C | I | Y | K | R | M | F | E | S     | E | N | K  | I | L | S | K | E | G | V | I | H | F | L | E | L | Y | E | T | K | I | L | P     | F | S | P     | E | F | S | E | F | I | T | C |
| Trm3p  | 376 | .....  | L | K     | S | S | M | B | S | V | R | K | Y | M | M | T     | L | M | F | S | I | T | N | M | S | A | F     | S | S | N  | L | P | L | T | I | K | T | L | P | A | A | M | S | A | H | Y | F | V | K | G     | V | S | C     | P |   |   |   |   |   |   |   |
| TARBP1 | 421 | P      | L | M     | D | A | L | S | E | S | S | L | Y | S | R | S     | P | G | Q | P | I | G | S | C | S | P | L     | G | T | K  | L | Q | K | F | L | V | T | Y | I | S | L | L | P | E | E | I | K | S | S | F     | L | L | K     | F | I | R | K | M | T | S | R |
| Trm3p  | 430 | H      | G | E     | K | L | S | T | F | V | N | N | L | S | Q | T     | T | E | G | I | S | D | I | L | F | E | I     | T | K | L  | L | V | E | K | G | T | S | F | D | P | S | R | I | Y | L | S | Y | C | I | L     | V | F | Q     | N | N | K | Q | R | T |   |   |
| TARBP1 | 481 | H      | W | C     | A | V | P | L | L | F | L | S | R | A | L | A     | N | V | P | R | H | K | A | L | G | I | D     | G | L | L  | A | L | R | D | V | I | H | C | T | M | I | T | H | Q | I | L | L | R | C | A     | A | Q | C     | Y | L | L | Q | T | A | M | N |
| Trm3p  | 490 | I      | N | S     | D | H | L | S | L | T | R | K | T | Y | D | F     | A | A | E | E | E | V | L | E | T | T | ..    | I | Q | T  | I | Y | L | K | F | L | L | Y | T | D | P | S | V | S | A | S | E | L | L | F     | T | L | V     | S | H | I | K | L | K | G |   |
| TARBP1 | 541 | L      | L | D     | V | E | K | V | S | L | S | D | V | S | T | F     | L | M | S | L | R | Q | P | E | S | L | G     | R | G | T  | S | L | W | T | E | L | C | D | W | L | R | V | N | B | S | Y | F | K | P | S     | P | T | C     | S | I | G | L | H | K | T |   |
| Trm3p  | 548 | G      | T | Y     | K | Y | V | E | P | L | F | E | D | Y | R | ..... | D | L | A | V | S | H | F | D | D | T | Q     | A | K | E  | N | I | T | T | N | I | G | K | D | T | I | F | D | L | L | A | S | I |   |       |   |   |       |   |   |   |   |   |   |   |   |
| TARBP1 | 601 | S      | L | N     | A | Y | V | K | S | I | V | Q | E | Y | V | K     | S | A | W | E | T | G | E | N | C | F | M     | P | D | W  | F | E | A | K | L | V | S | T | M | V | L | L | A | V | D | V | E | G | M | K     | T | Q | Y     | S | G | K | Q | R | T | E |   |
| Trm3p  | 594 | I      | F | D     | F | K | D | I | T | P | D | F | L | I | E | V     | A | K | S | K | D | I | P | V | Y | T | S     | K | A | V  | T | F | L | T | Q | L | L | S | G | E | P | S | N | G | Y | T | Y | E | N | A     | T | A | L     | L | S | Y | P | N |   |   |   |
| TARBP1 | 661 | N      | V | L     | R | I | F | L | D | P | L | D | V | L | M | K     | F | S | T | N | A | Y | M | P | L | L | K     | T | D | R  | C | L | Q | L | L | K | L | L | N | T | C | R | L | K | G | S | A | Q | D | D     | V | S | T     | V | Q | N |   |   |   |   |   |

Trm3p 654 F T I S T W K S I N V N N I F K S V M E K F S . . . . L D K F K F A E I Y Q K T Y E C R F D T I E L N F N D L S L Y  
TARBP1 721 F F M S T T E S I S E F I R R L T M N E L N S V S D L D R C H L Y L M V L I E L I N L H L K V G W K R G N P I W R V I

Trm3p 710 E M V K K S A N Q C S R E S F K V K I S A Y S Y F E L I N . . . . .  
TARBP1 781 S L L K N A S I C H L Q E M D S G Q E P T V G S Q I Q R V V S M A A L A M V C E A I D Q K P E L Q L D S L H A G P L E S

Trm3p 741 F L K T Y A L N R D S S E G N D D E L H I L R R L V D E N I N K D N G N . . . . . Y L G N L A V C K L L Y F  
TARBP1 841 F L S L Q L N Q T L Q K E H A E Q S S Y A H F L E C S S V L E S S S S Q G W G K I V A Q Y I H D Q W V C L S F L L

Trm3p 790 I I D S Y I H C S T . . . . . S V S D D I F I V K F I F E K F S F I W E C I  
TARBP1 901 K K Y H T L I P T T G S E I L E P F L P A V Q M P I R T L Q S A L E A L T V L S S D Q V L P V F H C L K V L V P K L L T

Trm3p 824 N S E R L V I K E R D L H L M L I K C L F H P V I L Y F G . . . . . S N Q Y I D T L T S K L E F H A Q T I I S I S Y  
TARBP1 961 S S E S L C I E S F D M A W K I I S S L S N T Q L I F W A N L K A F V Q F V D N K V L T I A A K I K G Q A Y F K I K E

Trm3p 877 S R R S L L P L L G S Q L R V F M K F Y G K L L R . . . . . E D V N Y W W L I N I I I V G V F K Q P Q  
TARBP1 1021 I M Y K I I E M S A I K T C V F N T L I S Y C C Q S W I V S A S N V S Q G S L S S A K N Y S E L I L E A C I F G T V F R

Trm3p 922 M D V N L Y K L K P V I S S L F D H K L N N Y Y I K G D E L Y E K V Y G P D E I L A R V S I D S I L Y A N D Q L K I R  
TARBP1 1081 R D Q R L V Q D V Q T F I E N L G H D C A A N I V M E N T K R E D H Y V R I C A V K F L C L L D G S N M S H K L F I E D

Trm3p 982 L I E K V T E K T N A L Y A I K R T D G A E A L O R . . . . . L L Q W Q L L L I S L T T N E K K L S E T S M I R I L K S I E  
TARBP1 1141 L A I K L I D K D E L V S K S K K R Y Y V N S L Q H R V K N R V W Q T L L V L F P R L D Q N F L N G I T D R I F Q A G F

Trm3p 1040 D E S S P L V R V Y K E W E T S S K V V D Y Y K T G . . . . . N P K F A E D Y L F S L L E D H S K P V F V V S A  
TARBP1 1201 T N N Q A S I K Y F I E W I T I L I L H K F P Q F L P K F W D C F S Y G E E N L K T S I C T F L A V L S H L D I T Q N

Trm3p 1091 E K I C F M V L K D L R N D E K K Y C F T Q L L D R . . . . . F I C T L V P N A A S N K P L V R H F S N S L I I S I W P T F  
TARBP1 1261 I P E K K L I L R Q A L I V V L Q W C F N H N F S V R L Y A L V A L K K L W T V C K V L S V E E F D A L T P V I E S S L

Trm3p 1148 K A Y L S D H T I R N I I E N L Y S N A K K T Q I F G Q Y R A G D A N T W D L K G D R K L T N M F G G V L K K V T D H D  
TARBP1 1321 H Q V E S M H G A G N A K K N W Q R I Q E H F F F A T F H P L K D Y C L E T I F Y I L P R L S G L I E D E W I T I D K F

Trm3p 1208 C P Y I S E S V F E K Y L Q E K D I V P I G T D E R S L W L D K R D . . . . . T N T E S V N N A N I S C D T S P L Q T K S G A W  
TARBP1 1381 T R F T D V P L A A G F Q W Y L S Q T Q L S K L K P G D W S Q Q D I C T N L V E A D N Q A E W T D V Q K K I I P W N S R



Trm3p 121 HLFNDNF<sup>.</sup>GKKIVQPF<sup>.</sup>FD<sup>.</sup>SFA<sup>.</sup>EEQ<sup>.</sup>NANIKHENLHLDILSL<sup>.</sup>LHYLEVVYLFDECKN<sup>.</sup>GI<sup>.</sup>SSK<sup>.</sup>C  
TARBP2 1 .....MSEEEQGS.....GTTTG<sup>.</sup>C

Trm3p 181 LDFI<sup>.</sup>IVP<sup>.</sup>IL<sup>.</sup>GCN<sup>.</sup>SEEIADSCSKLMRWHIKYLSKCCNTDSNFDKLIWTFIKQLYAEGSQQA<sup>.</sup>  
TARBP2 15 GLPS<sup>.</sup>IEQ<sup>.</sup>MLA<sup>.</sup>ANP.....

Trm3p 241 WKQKNSLSFLLRFL<sup>.</sup>LAAEL<sup>.</sup>SPELITYIKTDAYWRHIQT<sup>.</sup>ELDNDVHEHRK<sup>.</sup>LALSILKLTIQ<sup>.</sup>  
TARBP2 .....

Trm3p 301 KLSSHGITLQ<sup>.</sup>TFYK<sup>.</sup>CND<sup>.</sup>LANT<sup>.</sup>EML<sup>.</sup>CSWKK<sup>.</sup>FT<sup>.</sup>LYEMI<sup>.</sup>ALD<sup>.</sup>TSLNQIQA<sup>.</sup>AKQDIKIFDN<sup>.</sup>  
TARBP2 28 .....GK<sup>.</sup>TP<sup>.</sup>ISL<sup>.</sup>LQ<sup>.</sup>EY<sup>.</sup>GTRIGK<sup>.</sup>TP<sup>.</sup>VYDLL<sup>.</sup>KAE<sup>.</sup>G.....

Trm3p 361 EHLHHSWGLILLSTGLKSSMESVRKYMM<sup>.</sup>ILM<sup>.</sup>FS<sup>.</sup>IT<sup>.</sup>NMSAFSSNLPLLTK<sup>.</sup>ILLPAAMSAHY<sup>.</sup>  
TARBP2 56 .....QAHQP<sup>.</sup>NFT<sup>.</sup>FR<sup>.</sup>VT.....

Trm3p 421 FD<sup>.</sup>VKG<sup>.</sup>VSC<sup>.</sup>PHGEKLSLFVNLLSQTTEGISDILFEILKLLVEKGT<sup>.</sup>SFDP<sup>.</sup>SRIYLSYGILV<sup>.</sup>  
TARBP2 68 ..VGD<sup>.</sup>IS<sup>.</sup>CTG.....

Trm3p 481 FFQNNKQKTINS<sup>.</sup>DHLSLIRKLYDFAAEEEVLETTIQ<sup>.</sup>TIY<sup>.</sup>LKFLLYID<sup>.</sup>PSV<sup>.</sup>SA<sup>.</sup>SELLFTLV<sup>.</sup>  
TARBP2 76 .....QG<sup>.</sup>PSKKA<sup>.</sup>AKHKAAEV<sup>.</sup>

Trm3p 541 SHI<sup>.</sup>KLKG<sup>.</sup>TYKY<sup>.</sup>VEPL<sup>.</sup>FED<sup>.</sup>YRDLAVSHFDDLQAKENLTNIGKDTIFDLLASIIFDFKDI<sup>.</sup>  
TARBP2 91 ALK<sup>.</sup>HLKG<sup>.</sup>..SM<sup>.</sup>LEPA<sup>.</sup>LED<sup>.</sup>S.....

Trm3p 601 DITPDLIEVAKSKQDIPVYTSKAV<sup>.</sup>TFL<sup>.</sup>TQL<sup>.</sup>LSGE<sup>.</sup>PSNGYT<sup>.</sup>YEN<sup>.</sup>ATA<sup>.</sup>LLSY<sup>.</sup>PNFTISTWK<sup>.</sup>  
TARBP2 109 .....S<sup>.</sup>SF<sup>.</sup>SPL<sup>.</sup>DS<sup>.</sup>SL<sup>.</sup>PEDIPV<sup>.</sup>ETA<sup>.</sup>AAA<sup>.</sup>ATPV<sup>.</sup>.....

Trm3p 661 SINVNNLFKSVMEKFSLDKFKFFAEIYQKTYE<sup>.</sup>CRFD<sup>.</sup>TIE<sup>.</sup>LN<sup>.</sup>FND<sup>.</sup>LS<sup>.</sup>LYEM<sup>.</sup>VKK<sup>.</sup>SAN<sup>.</sup>QCS<sup>.</sup>  
TARBP2 136 .....SV<sup>.</sup>VLT<sup>.</sup>RS<sup>.</sup>PP<sup>.</sup>ME<sup>.</sup>LQ<sup>.</sup>PP<sup>.</sup>VSP<sup>.</sup>QQ<sup>.</sup>SE<sup>.</sup>CN<sup>.</sup>



Trm3p 721 RESFKVKDSAYSSYF<sup>EL</sup><sup>LN</sup><sup>T</sup>FLKTYALNRDSSEGNDD<sup>EL</sup>HILLRLVDENINKDNGNYLGN  
TARBP2 160 .....PVGALQ<sup>EL</sup><sup>V</sup><sup>Q</sup>KG.....

Trm3p 781 LAVCKLLYFIIDSYIHCSTSVSDDDI<sup>F</sup>IVK<sup>F</sup>IFEKFSFIWECINSERLVLKERDLHMLI  
TARBP2 .....S.....I.....

Trm3p 841 KGLFHPVILYFGSNQYIDTLT<sup>S</sup>KLEEHAQTII<sup>S</sup>LSYSRRSLLPL<sup>L</sup>GSQ<sup>L</sup>RVFMKFY<sup>G</sup>KLL  
TARBP2 .....S.....

Trm3p 901 REDVNY<sup>W</sup><sup>L</sup><sup>I</sup>INII<sup>V</sup>GVFKQ<sup>P</sup>QMDVNLYK<sup>L</sup>KPV<sup>I</sup>SSLF<sup>D</sup>HK<sup>L</sup>NNY<sup>I</sup>KGD<sup>E</sup>LYEKVYGPDE  
TARBP2 173 .....<sup>W</sup><sup>R</sup><sup>L</sup>PEY<sup>T</sup><sup>V</sup>TQES<sup>G</sup>.....

Trm3p 961 ILARVSIIDSILYANDQLKIRLIEKVTEKTNALYA<sup>I</sup>KRTDGAELQ<sup>R</sup>LLQ<sup>W</sup>QLLLLSLLT  
TARBP2 .....S.....

Trm3p 1021 TNEKKLSETSMIRILKSIED<sup>E</sup>SSPLVRVYKEWF<sup>I</sup>SSKVVDY<sup>I</sup>YKTGNPKFAEDY<sup>L</sup>FSLLED  
TARBP2 .....S.....

Trm3p 1081 HSKPVFVVS<sup>A</sup>EKICFMVLKDLRNDE<sup>K</sup><sup>Y</sup><sup>G</sup>FTQL<sup>L</sup><sup>D</sup><sup>R</sup><sup>F</sup><sup>I</sup>CTLV<sup>P</sup>NAA<sup>S</sup><sup>N</sup><sup>K</sup><sup>P</sup><sup>L</sup><sup>V</sup><sup>R</sup><sup>H</sup><sup>F</sup><sup>S</sup><sup>N</sup><sup>S</sup><sup>L</sup><sup>I</sup>  
TARBP2 187 .....AHR<sup>K</sup><sup>E</sup><sup>F</sup>TM<sup>T</sup>CR<sup>V</sup><sup>E</sup><sup>R</sup><sup>F</sup><sup>I</sup>EIGSG...<sup>T</sup><sup>S</sup><sup>K</sup><sup>K</sup><sup>L</sup><sup>A</sup><sup>K</sup><sup>R</sup><sup>N</sup><sup>A</sup><sup>A</sup><sup>K</sup><sup>M</sup>

Trm3p 1141 <sup>I</sup><sup>S</sup><sup>L</sup><sup>W</sup><sup>E</sup><sup>T</sup><sup>F</sup><sup>K</sup><sup>A</sup><sup>Y</sup><sup>L</sup><sup>S</sup><sup>D</sup><sup>H</sup><sup>T</sup><sup>L</sup><sup>R</sup><sup>N</sup><sup>I</sup><sup>I</sup><sup>E</sup><sup>N</sup><sup>L</sup><sup>Y</sup><sup>S</sup><sup>N</sup><sup>A</sup><sup>K</sup><sup>K</sup><sup>T</sup><sup>Q</sup><sup>I</sup><sup>F</sup><sup>G</sup><sup>Q</sup><sup>Y</sup><sup>R</sup><sup>A</sup><sup>G</sup><sup>D</sup><sup>A</sup><sup>N</sup><sup>I</sup><sup>W</sup><sup>D</sup><sup>L</sup><sup>K</sup><sup>G</sup><sup>D</sup><sup>R</sup><sup>K</sup><sup>L</sup><sup>T</sup><sup>N</sup><sup>M</sup><sup>F</sup><sup>G</sup><sup>G</sup><sup>V</sup><sup>L</sup>  
TARBP2 222 <sup>L</sup><sup>L</sup><sup>R</sup><sup>V</sup><sup>H</sup><sup>T</sup><sup>V</sup><sup>P</sup><sup>L</sup><sup>D</sup><sup>A</sup><sup>R</sup><sup>D</sup><sup>G</sup><sup>N</sup><sup>E</sup><sup>V</sup><sup>E</sup><sup>P</sup><sup>D</sup><sup>D</sup><sup>D</sup><sup>H</sup><sup>S</sup><sup>I</sup><sup>G</sup><sup>V</sup><sup>G</sup><sup>S</sup><sup>R</sup><sup>L</sup><sup>D</sup><sup>G</sup><sup>L</sup><sup>R</sup><sup>N</sup><sup>E</sup><sup>G</sup><sup>P</sup><sup>G</sup><sup>C</sup><sup>T</sup><sup>W</sup><sup>D</sup><sup>S</sup>.....

Trm3p 1201 KKVDHDHCPY<sup>T</sup>SE<sup>S</sup><sup>V</sup><sup>F</sup><sup>E</sup><sup>K</sup><sup>Y</sup><sup>L</sup><sup>Q</sup><sup>E</sup><sup>K</sup><sup>D</sup>IVPIGTDERSLWLDKRDTNTESVNNANI<sup>S</sup><sup>C</sup><sup>D</sup><sup>T</sup><sup>S</sup><sup>E</sup><sup>P</sup><sup>I</sup><sup>Q</sup>  
TARBP2 268 .....<sup>L</sup><sup>R</sup><sup>N</sup><sup>S</sup><sup>V</sup><sup>G</sup><sup>E</sup><sup>K</sup><sup>I</sup><sup>L</sup><sup>S</sup><sup>L</sup><sup>R</sup>.....<sup>S</sup><sup>C</sup><sup>S</sup><sup>L</sup><sup>G</sup><sup>S</sup><sup>L</sup><sup>G</sup>

Trm3p 1261 TKS<sup>E</sup><sup>A</sup><sup>W</sup><sup>E</sup><sup>T</sup><sup>V</sup><sup>L</sup><sup>D</sup><sup>L</sup><sup>D</sup><sup>N</sup><sup>K</sup><sup>K</sup><sup>S</sup><sup>N</sup><sup>D</sup><sup>V</sup><sup>V</sup><sup>T</sup><sup>R</sup><sup>S</sup><sup>E</sup><sup>T</sup><sup>I</sup><sup>V</sup><sup>S</sup><sup>S</sup><sup>L</sup><sup>V</sup><sup>D</sup><sup>K</sup><sup>P</sup><sup>P</sup><sup>N</sup><sup>L</sup><sup>G</sup><sup>T</sup><sup>C</sup><sup>R</sup><sup>L</sup><sup>C</sup><sup>D</sup><sup>V</sup><sup>L</sup><sup>G</sup><sup>V</sup><sup>L</sup><sup>L</sup><sup>T</sup><sup>V</sup><sup>Q</sup><sup>D</sup><sup>I</sup><sup>K</sup>  
TARBP2 289 ALG<sup>E</sup><sup>A</sup><sup>C</sup><sup>C</sup><sup>R</sup><sup>R</sup><sup>V</sup><sup>L</sup><sup>S</sup><sup>E</sup><sup>L</sup><sup>S</sup><sup>E</sup><sup>E</sup>.....<sup>Q</sup><sup>A</sup><sup>F</sup><sup>H</sup><sup>V</sup><sup>S</sup><sup>Y</sup><sup>L</sup><sup>D</sup><sup>I</sup><sup>E</sup><sup>E</sup><sup>L</sup><sup>S</sup><sup>L</sup><sup>S</sup><sup>G</sup><sup>L</sup><sup>C</sup><sup>Q</sup><sup>C</sup><sup>L</sup><sup>V</sup><sup>E</sup><sup>L</sup><sup>S</sup><sup>T</sup>.....

Trm3p 1321 VKNHPQFKNVAVTADRWWPMEEVALDEIASFMKEKKKEGYTLI<sup>C</sup><sup>L</sup><sup>E</sup><sup>Q</sup><sup>T</sup><sup>D</sup><sup>K</sup><sup>S</sup><sup>V</sup><sup>K</sup><sup>L</sup><sup>D</sup><sup>N</sup><sup>N</sup><sup>F</sup><sup>Q</sup><sup>F</sup>  
TARBP2 332 .....QPATVCH<sup>C</sup><sup>S</sup><sup>A</sup><sup>T</sup><sup>T</sup><sup>R</sup><sup>E</sup><sup>A</sup><sup>A</sup><sup>R</sup><sup>G</sup><sup>E</sup><sup>A</sup><sup>A</sup><sup>R</sup><sup>R</sup><sup>A</sup>

Trm3p 1381 PKKSL<sup>I</sup><sup>L</sup><sup>L</sup><sup>G</sup><sup>T</sup><sup>E</sup><sup>A</sup><sup>F</sup><sup>G</sup><sup>I</sup><sup>P</sup><sup>G</sup><sup>T</sup><sup>L</sup><sup>L</sup><sup>S</sup><sup>E</sup><sup>L</sup><sup>D</sup><sup>L</sup><sup>C</sup><sup>L</sup><sup>E</sup><sup>I</sup><sup>Q</sup><sup>Q</sup><sup>F</sup><sup>G</sup><sup>V</sup><sup>I</sup><sup>R</sup><sup>S</sup><sup>M</sup><sup>N</sup><sup>I</sup><sup>Q</sup><sup>T</sup><sup>A</sup><sup>T</sup><sup>A</sup><sup>V</sup><sup>I</sup><sup>V</sup><sup>H</sup><sup>S</sup><sup>Y</sup><sup>T</sup><sup>V</sup><sup>Q</sup><sup>H</sup><sup>M</sup>  
TARBP2 356 LQYLK<sup>T</sup><sup>M</sup><sup>A</sup><sup>G</sup><sup>S</sup><sup>K</sup>.....

**Figure S3.** Sequence comparison between Trm3p from *Saccharomyces cerevisiae* and TRBP isoforms from *Homo sapiens*. Uniport entries of Trm3p, TARBP1, and TARBP2 are Q07527, Q13395, and Q15633, respectively. The overall identity and similarity between Trm3p and TARBP1 sequences are 15.9% and 33.4%, respectively. The overall identity and similarity between Trm3p and TARBP2 sequences are 21.9% and 39.9%, respectively.

Trm4p 121 PKTVIRKNEQF A K T Q R F L V E N A V C N I S R Q E A V S M I P P I V L E V K P H H T V L D M C A P G S K T  
 Pmt1 1 . . . . . M L S T K R L R V L E L Y S G . . . . . I G M H Y A T N L A N I P . . . . .

Trm4p 181 A Q L I E A L H K D T D E P S G F V V A N D A D A R R S H M L V H Q L K R L N S A N L M V V N H D A Q F F P R I R L H G  
 Pmt1 30 A D I V C A I D I N P Q A N E I Y N L N H G K L A K H M D I S T L T A K D F D A F D C K L W T M S P S C Q P F T R I G .

Trm4p 241 N S N N K N D V L K F D R I L C D V P C S G D G T M R K N V N V W K D W N T Q A G L G L H A V Q I N I L N R G L H L L K  
 Pmt1 89 . . . N R K D I L D P R . . . . . S Q A F L N I L N V L P H V N N L P E Y I L I E N V Q G F E E S K A A

Trm4p 301 N N G R L V Y S T C S L N P I E N E A V V A E A L R K W G D K I R L V N C D D K L P G L I R S K G V S K W P V Y D R N L  
 Pmt1 133 E E C R K V L R N C G Y N L I E G I L S P N Q F N . . . . . I P N S R S R W Y G L A R L N F K G E W S I D D V F Q

Trm4p 361 T E K T K G D E C T I D S F F S P S E E E A S K F N L Q N C M R V Y P H Q Q N T G G F F I T V F E K V E D S T E A A T E  
 Pmt1 185 F S E V A Q K E C E V K R I R . . . . .

Trm4p 421 K L S S E T P A L E S E G P Q T K K I K V E E V Q K K E R L P R D A N E E P F V F V D P Q H E A L K V C W D F Y G I D N  
 Pmt1 200 . . . . . D Y L E I E R D W S S Y M V L E S V L N K W G H Q F D I V K P . . . . .

Trm4p 481 I F D R N T C L V R N A T G E P T R V Y T V C P A L K D V I Q A N D D R L K I I Y S G V K L F V S Q R S D I E C S W R  
 Pmt1 231 . . D S S S C C C F T R G . . . . . Y T H L V Q G A G . . . . . S I L Q M S D H E N T H E

Trm4p 541 I Q S E S L P I M K H M K S N R I V E A N L E M L K H L L I E S F P N F D I R S K N I D N D F V E K M T K L S S G C  
 Pmt1 264 Q F E R N R M A L Q L R Y F T A R E V A R . . . . . L M G F P E S L E W S K S N V T . . . . .

Trm4p 601 A F I D V S R N D P A K E N L F L P V W K G N K C I N L M V C K E D T H E L L Y R I F G I D A N A K A T P S A E E K E K  
 Pmt1 301 . . . . . E K C M Y R L L G N S I N V K V V S Y L I S L L L

Trm4p 661 E K E T T E S P A E T T T G T S T E A P S A A N  
 Pmt1 326 E P L N F . . . . .

**Figure S4.** Sequence comparison between Trm4p from *Saccharomyces cerevisiae* and Pmt1

protein from *Schizosaccharomyces pombe*. Uniport entries of Trm4p and Pmt1 are P38205 and P40999, respectively. The overall identity and similarity between these two sequences are 17.9% and 37.0%, respectively.

```

Trm5p  1  MKIALPVFQKFNRLISCKM•SGVFPYNPPVNRQMRELD•RSFFITKIPMC•AVKFFEPKN•IS
TrmD   1  ..MKIDILTLFPEMFSPLEH•SI•VG.....KAREKGL•LD

Trm5p  61  VFSKNFKN•NCILRVFRI•PHVVKLNSSKPKDELTSVQNK•KLKTADGNNT•EVTKGV•LV•LHES•TH
TrmD   32  IQYHNFR...ENAEKAR•HV•DDE.....PYGGQG•MLLR•AQ

Trm5p  121 SVE•DAYGK•LPEDALAF•LKENS•AEIVPHEYVLDYDFW•KAEEILRA•VLP•EQF•LE•EVPTG•FTI
TrmD   64  PIFDSFDAIEKKNPRVILL•D.....PAGKQFDQ•AY•ADL•AQEELI•FiC

Trm5p  181 TGHIAHLNLRTEFKPFD•SLIGQVIL•DKNN•KIECV•VDKVS•IA•TQFRTP•MKV•IAGKSDSL
TrmD   108 G.....HYGYDERIK•TLV•TD•EISLGD•V•LTGGEL•AA•MTMIDAT•VR•LI•PEVIGKE

Trm5p  241 VVEQ•KESNCTFKFD•FSKVYWN•SR•LHTE•HERLV•KQY•FQF•GQV•VC•DV•FA•GVGPF•AVPAGKKD
TrmD   158 SSHQ•DS.....FS•SGLLE•YPQYT•RP•YD•YRG•MM•VV•PD•VL•MSG.....

Trm5p  301 VIVLANDLNPE•SYKYLKENIALNKVAKTVK•SFNMDGADFIRQSPQL•IQ•QW•IQD•E•EGGKIT
TrmD   194 .....HHEK•IR•OW•RLY•ES.....

Trm5p  361 I•PLPLK•K•RHRSQQHNDQPPQ•PRTELII•PSH•IS•HY•V•MNL•PD•SAISFLGNFRGIFA•AHTK
TrmD   207 L•KKTYE•RR.....PDL•LE•HY•QL•TV•EE.....

Trm5p  421 GATDTIQMPV•WVHVCFEKYPPGDQVTEDELHARVHA•RI•IA•LK•VT•AD•DLPLNAVSLHLVR
TrmD   228 .....E•KML•AE•IK•EN•KE.....

```

**Figure S5.** Sequence comparison between Trm5p from *Saccharomyces cerevisiae* and TrmD from *Streptococcus pneumoniae*. Uniport entries of Trm5p and TrmD are P38793 and B8ZND2, respectively. The overall identity and similarity between these two sequences are 17.6% and 38.9%, respectively.



Trm13p 1 M L Q D N N G P A V K R A K P S E R L Q C E Y F M E K K K R R C G M T R S S Q N L Y C S E H L N L M K K A A N S Q V H N  
U11-48K 1 . M E G E P P P V E E R R . . . . . R L Q E E L N E F V E S G . . . . . C R T L E E V T A S L G W D L D S L

Trm13p 61 K N G S E A E K E R E R V P C P L D P N H T V W A D Q L K K H L K K C N K T K L S H L N D D K P Y Y E P G Y N G E N G L  
U11-48K 44 D P G E E A A E D E V V I C P Y D S N H M P K S S L A K H M A S C R L R K M G Y T K E E . . . . .

Trm13p 121 L S S S V K I D I T A E H L V Q S I E L Y K V F E G E S M D E L P L R Q L N N K L M S L K R F P Q L P S N T K H A V Q  
U11-48K 90 . . . . . E D E M Y N P E F F Y E N V K I P S I T L N K D S Q F . . . . . Q I I K Q A R T A V G

Trm13p 181 Q S S L I E N L V D A G A F E R P E S L N F I E F G C G R A E F S R Y V S L Y L L T Q I T S L P A E H S G S N S N E F V  
U11-48K 128 K D S D C Y N Q R I Y S S L P V E V P L N H K R F V C D L T Q A D R L A L Y D F V V E E T K K K R S D S Q I E N D S D

Trm13p 241 L I D R A T N R M K F D K K I K D D F S E I K S N S P S K P I S C P S I K R I K I D I R D L K M D P I L K S T P G D D I  
U11-48K 188 L F V D L A A K I N Q D N S R K . . . . . S P K S Y L E I L A E V R D Y K R R . . . . . R Q

Trm13p 301 Q Y V C I S K H L C G V A T D L T I R C I C M S S I L H G D D N N G C N P K L K A I C I A M C C R H V C D Y C D Y V N R  
U11-48K 224 S Y R A K N V H I T K K S Y T E V I R D V I N . . . . . V H M E E L S N H W Q E E Q E K

Trm13p 361 S Y V T S L V E K Y R A H G S I L T Y E T F F R V L T K L C S W G T C G R K P G T A I T D I V N V S F E G A E P Y T  
U11-48K 263 A E D D A E K N E E R R S A S V D S R Q S G G S Y L D A E C S R . . . . .

Trm13p 421 I T I K E R E N I G L M A R R V I D E G R L V Y V K E K F T E F N A E L I R Y V E S F V S L E N V A M L V Y K K  
U11-48K 295 . . . . . H R R D R S R S P H K R K R N K D K R N C E S R R K E R D G E R H H S H K R R K Q K I

**Figure S7.** Sequence comparison between Trm13p from *Saccharomyces cerevisiae* and U11-48K protein from *Homo sapiens*. Uniport entries of Trm13p and U11-48K are Q12383 and Q6IEG0, respectively. The overall identity and similarity between these two sequences are 19.8% and 31.6%, respectively.



Trm44p 1 M T G D G S A H I S K N N Q N Q H K D R F K F T V N D K S . . . T L G P Q W L S L Y Q T D G K V T F A K S H F E Q A M  
Trmt44p 1 M A E V G R T G I S Y P G A L L P Q G F W A A V E V W L E R P Q V A N K R L C G A R L E A R W S A A L P C A E A R G P G

Trm44p 57 M N V I R E P N I N S T V I L R A D I L K E I N H A A E A C S E P K F D E S V T K K F E I D N G N E S G E E D V K K T I N  
Trmt44p 61 T S A G S E Q K E R G P G P G Q G S P G G G P G P R S L S C P E Q G T A C C E T E E A Q G Q C Q Q E A Q R E A S V P

Trm44p 117 T E D L N I R . . . . S C E T S E S I K L S P V H E F V R R I T P R N F Y K D A I I N Q C L I L N S K D P N F Q E T  
Trmt44p 121 T R D S G H P G H A E G R E G D F P A A D L D S L W E D F S Q S L A R . G N S E L L A F L T S S G A C S Q P E A Q R E L

Trm44p 172 S L I V Y R P H I N S E K D C P F Y I P R T Q S V G I L I H Q S V L S V H Y T P F P E D K T A F T D E S . . . . .  
Trmt44p 180 D V V I R R V I P K T S P H C P L T T P R R E I V Q D V L N G T I T F L P L E E D D E G N L K V K M S N V Y I Q I L S

Trm44p 224 . . . . . E R V V T A Y R L L Q T A N K H S K G V M Q G Y E K R V N H D Q V V N K V  
Trmt44p 240 H S K E E W F I S V L I F C P E R W H S D G I V Y P K P T W L G E E L T A K L A K W S V E N K K S D F K S T L S L I S T

#### Motif X

Trm44p 262 N F Q N T Y I V L K K K Y S K F L V E N W A E S T D P K K H V E E D A T A A F L T E L W I K V Y G P D F R S K M Q F  
Trmt44p 300 M K Y S K A Y Q E L K E K Y K E M V K V W P E V T D E K F V Y E D A T A A Y L L T L W E E E R A E R R L T A R Q S F

#### Motif I

#### Motif II

#### Motif III

Trm44p 321 R D L G C G N G A L C Y I L S E S I K G L C I D A R K R K S W S I Y P P E V Q S S T K Q V I I P I L L R P H P A L  
Trmt44p 360 V D L G C G N G L I V H I L S S E G H P C R C I D V R R K I W D M Y G P Q T Q . . L E D A I T P R D K T L F P D V D

Trm44p 381 K R Q V P H L P H N G R F P V K V T H E V I A P A T V V Y S S E D L L K S F Q V N . . . . . T A E F P P  
Trmt44p 418 W L I G N H S D E L T P W I P V I A A R S S Y N C R F F V L P C C F D F I C R Y S R R Q S K K T Q Y R E Y L D F I K E

#### Motif IV

Trm44p 429 D T I I C N H S D E L T C W I P . . . . . L I C H P Y M V I P C C S H N F S G C R V R F N V R K R . . . . .  
Trmt44p 478 V G E T C G F H V D E D C L R I P S T K R V C L V G R S R T Y P S S R E A S V D E K R T Q Y I K S R R G C P V S P P G W

Trm44p 474 . . . . . S P R S N E I K  
Trmt44p 538 E L S P S P R W A A G S A G H C D G Q A L D A R V G C V T R A W A A E H G A G P Q A E G P W L P G F H P R E K A E R

Trm44p 482 N Q N S K S T Y S G L V D H V E Y T S S R V G W K V E K E M L R I P S T R N A A I I C V E N A T L K H F P . . . T Q  
Trmt44p 598 V R N C A A L P R D F T D Q V V L Q V A N L L L G G K Q L N T R S S R N G S L K T W N C G E S L S T A E V A N E L D K E

Trm44p 538 A V Y D M I W E D G G A E G W T Q N T M S I L K R N . . . . .  
Trmt44p 658 T L R R L K R E C G G L Q T L R N S H Q V F Q V V N G R V H I R D W R E E T L W K T K Q P E A K Q R L L S E A C K T R

Trm44p 564 . . . . . P R N R . . . . .  
Trmt44p 718 L C W F F M H H P D G C A L S T D C C P F A R G P A E L R P P R T T P R K K I S



**Figure S8.** Sequence comparison between Trm44p from *Saccharomyces cerevisiae* and Trmt44p from *Homo sapiens*. Uniport entries of Trm44p and Trmt44p are Q02648 and Q8IYL2, respectively. The overall identity and similarity between these two sequences are 18.1% and 32.3%, respectively. The motifs conserved in DUF1613 proteins are indicated above the sequences.

## References

- [1] Thompson, J.D., Gibson, T.J., Higgins, D.G., 2002. Multiple sequence alignment using ClustalW and ClustalX. Curr. Protoc. Bioinf. Chap. 2, Unit 2.3.
- [2] Robert, X., Gouet, P., 2014. Deciphering key features in protein structures with the new ENDscript server. Nucleic Acids Res. 42, W320-324.
